# Supplementary material for: Organic–inorganic hybrid tinphosphonate material with mesoscopic void spaces: an excellent catalyst for the radical polymerization of styrene
Source: Royal Society of Chemistry journal article supplement (doi:10.1039/c2cy00352j), 2012-01-01
Supplement: c2cy00352j.pdf [file c2cy00352j.pdf]

# Organic-inorganic hybrid tinphosphonate material with mesoscopic void spaces: an excellent catalyst for the radical polymerization of styrene

Malay Pramanik,<sup>†</sup> Mahasweta Nandi,<sup>‡</sup> Hiroshi Uyama<sup>‡</sup> and Asim Bhaumik\*

## Supporting Information

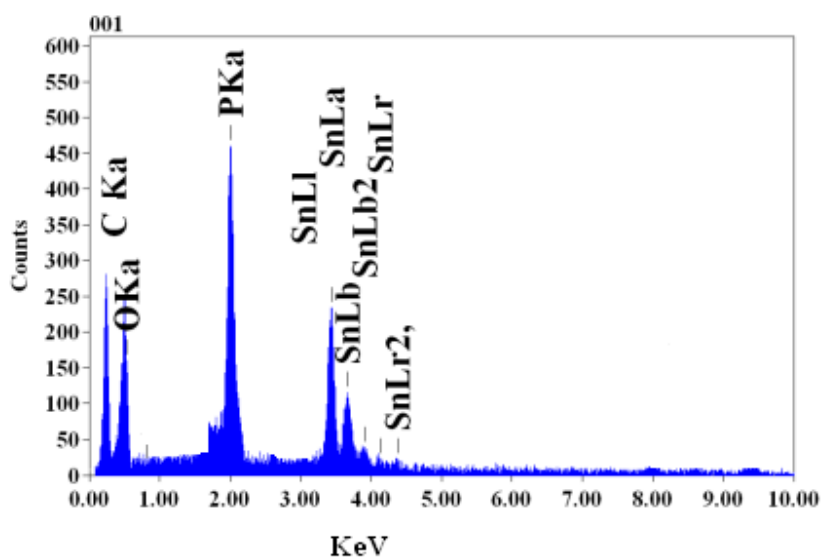

**Figure S1.** EDS surface chemical analysis of HSnP-1.

**Table S1.** EDS elemental composition in HSnP-1.

| Elements | KeV   | Mass% | Atomic% |
|----------|-------|-------|---------|
| C        | 0.253 | 8.7   | 21.27   |
| O        | 0.525 | 43.46 | 55.75   |
| P        | 2.013 | 17.07 | 15.56   |
| Sn       | 3.442 | 31.37 | 6.90    |

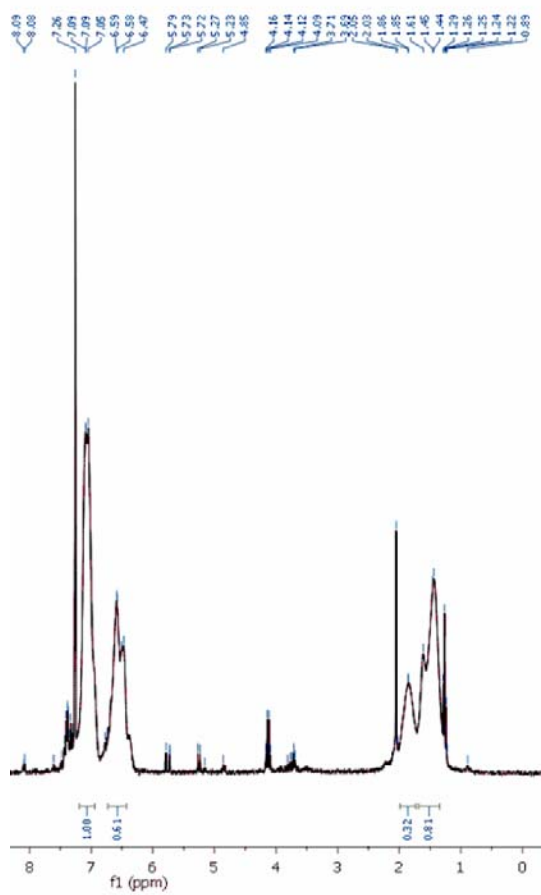

**Figure S2.**  $^1\text{H}$  NMR of the polystyrene product.

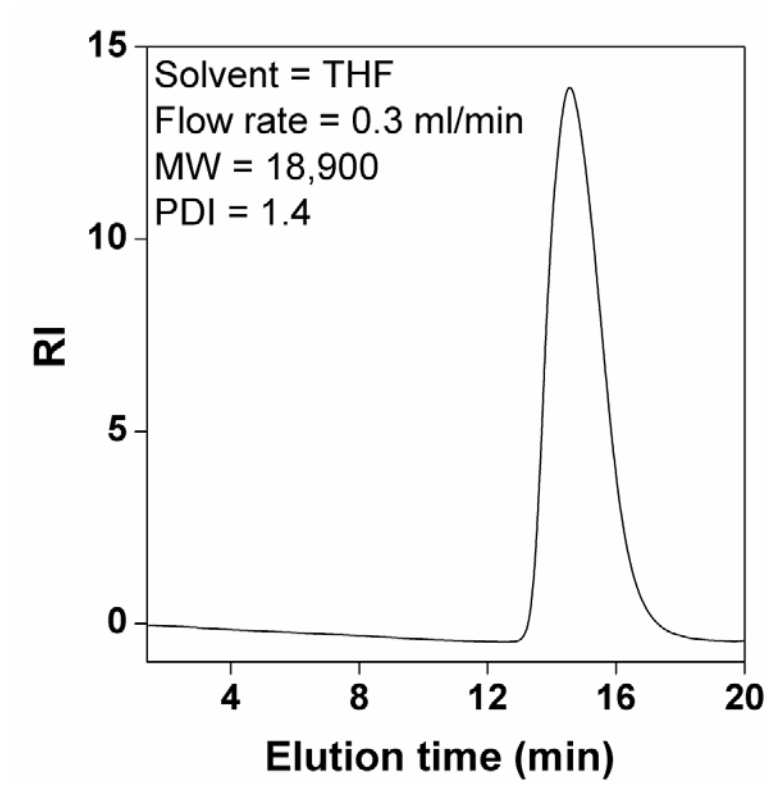

**Figure S3.** Gel permeation chromatographic profile of the polystyrene product.

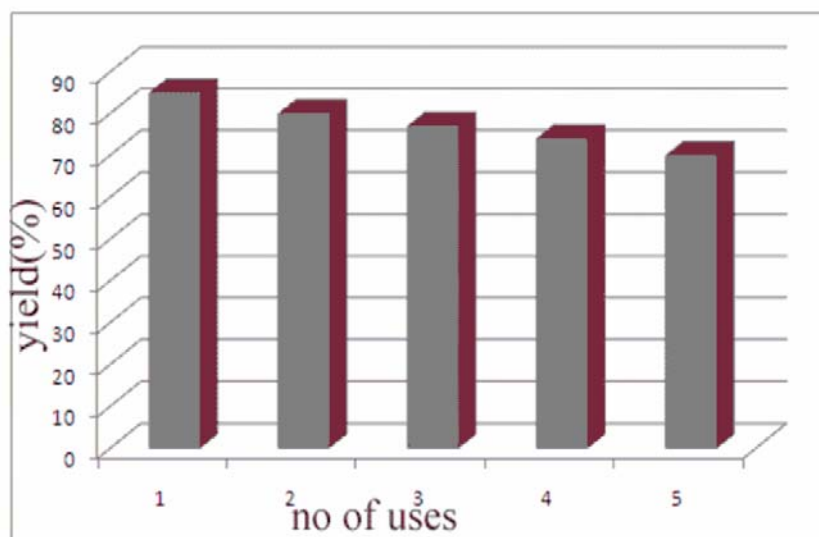

**Figure S4.** Recycling efficiency of HSnP-1 in the polymerization of styrene under solvent-free conditions.
